# Supplementary material
Source: HighWire-hosted journal article supplement (https://jnm.snmjournals.org/highwire/filestream/108821/field_highwire_adjunct_files/0/263177_Supplemental_Data.pdf)

Prospective phase II trial of prognostication by  $^{68}\text{Ga}$ -NOTA-AE105 uPAR PET in patients with neuroendocrine neoplasms: Implications for uPAR targeted therapy

Supplemental Figure 1:

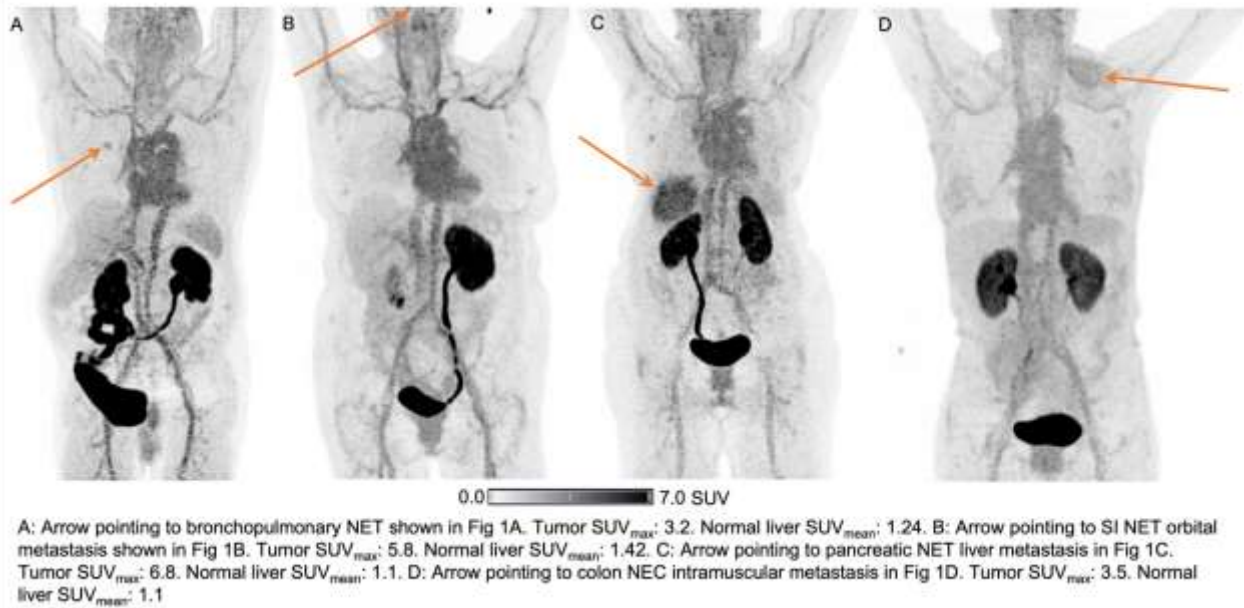

Supplemental Figure 2:

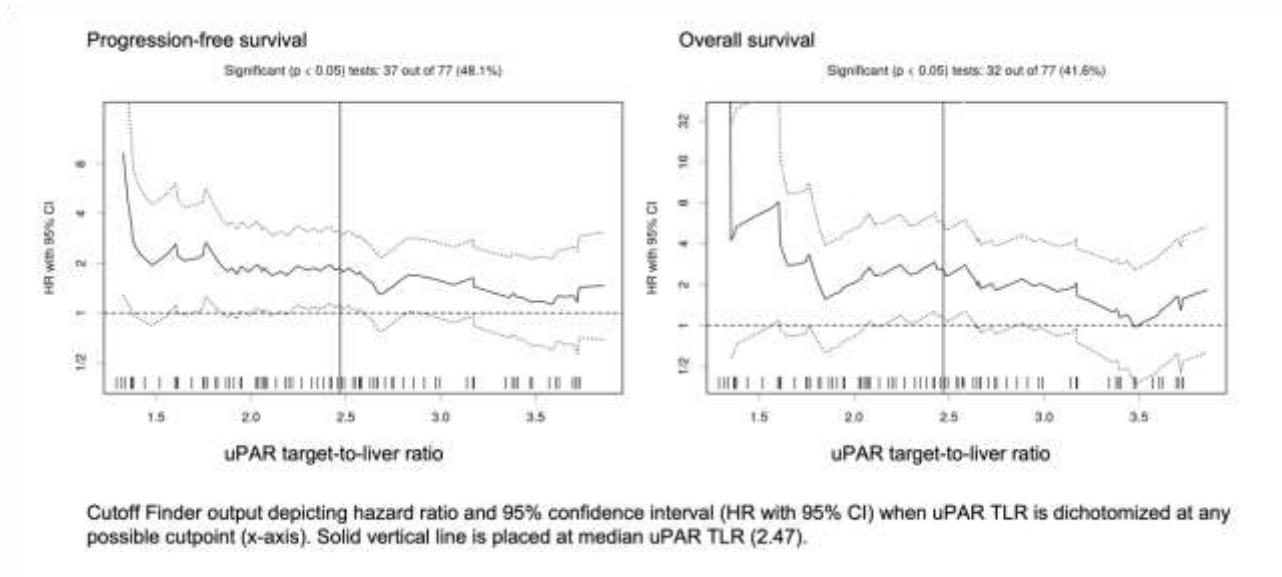

Supplement: 263177_Supplemental_Data.pdf [file 263177_Supplemental_Data.pdf]
